# Supplementary material
Source: Research Square preprint supplement (doi:10.21203/rs.3.rs-10084871/v1)
Supplement: Supplementary file 1 [file 65617bc94fe5788ce0c3f66a.docx]

**Table 1.** DLS of the tested Zn NPs

| Parameter | Tested Zn NPs |
| --- | --- |
| Peak 1 Peak 2 Peak 3 |
| Area % 98.0 2.0 0.0 | |
| Pdi 6.61 2.20 0.0 | |
| Zeta potential (mv) -34.4 -13.0 0.0 | |

**Table 2.** The effect of green Nano zinc on downy mildew incidence and severity disease caused by *P. viticola* as average of two seasons.

| **Treatments** | Disease incidence Disease severity |
| --- | --- |
| 7 days 15 days 7 days 15 days |
| T1) 0.00e 0.00c 0.00c 0.00c | |
| T2) 80.00a 100a 86.00a 89.00a | |
| T3) 30.00bc 23.30bc 36.29b 11.33bc | |
| T4) 40.00b 36.00b 29.33bc 18.50b | |
| T5) 0.00c 0.00c 0.00c 0.00c | |
| T6) 0.00c 0.00c 0.00c 0.00c | |

* Means within a column followed by different letter (s) are statistically different at 5 % level

**Table 3.** The effect of green Nano zinc on some vegetative growth measurements as average of two seasons of grape seedlings.

| Treatments Stem Stem No. of lateral Number of Total Leaf Chlorophyll Root height diameter shoots/ leaves/ area (cm2) (Spad) length (cm) (cm) seedling seedling (cm) |
| --- |
| T1) 41.66c 3.9a 2.0cd 14.00c 28.00de 11.83bc 24.00cd |
| T2) 17.66e 2.3d 1.3d 10.66d 14.00e 10.26c 16.66e |
| T3) 33.33d 3.2c 2.3bc 16.00bc 37.33cd 10.83bc 21.66d |
| T4) 50.33b 3.6b 2.6abc 18.33b 48.33bc 15.20a 27.00c |
| T5) 54.00ab 3.9a 3.0ab 21.00a 63.00ab 16.06a 31.33b |
| T6) 56.00a 4.1d 3.3a 21.66a 72.66a 13.46ab 36.00a |

* Means within a column followed by different letter (s) are statistically different at 5 % level

**Table 4.** The effect of green Nano zinc on macro and micro elements as average of two seasons of grape seedlings infected with downy mildew.

| Treatments N% P% K% Fe mg.kg-1 Zn mg.kg-1 Mn mg.kg-1 |
| --- |
| T1) 2.07c 0.265c 1.72b 75.64b 58.67b 57.59a |
| T2) 2.05c 0.248e 1.65b 74.59b 57.94b 56.50b |
| T3) 2.05c 0.257d 1.68b 75.25b 58.12b 57.23b |
| T4) 2.61b 0.337b 2.25a 79.11a 61.47a 61.26a |
| T5) 2.66ab 0.343b 2.30a 79.59a 61.85a 61.80a |
| T6) 2.74a 0.351a 2.33a 80.05a 62.17a 62.35a |

* Means within a column followed by different letter (s) are statistically different at 5 % level

**Table 5.** The effect of green Nano zinc on total phenol, peroxidase and chitinase activity as average of two seasons of grape seedlings infected with downy mildew.

| **Treatments** Total phenol Peroxidase activity Chitinase activity  (mg Gallic acid/100 g-1) (U g-1 FW min-1) (U g-1 FW min-1) |
| --- |
| T1) 23.24b 0.58d 3.75a |
| T2) 22.65b 0.53f 3.91a |
| T3) 23.00b 0.56e 3.83a |
| T4) 25.17a 0.73c 3.13b |
| T5) 25.30a 0.74b 3.04b |
| T6) 25.62a 0.77a 2.90b |

* Means within a column followed by different letter (s) are statistically different at 5 % level
